# Supplementary material for: Highly Sensitive Humidity Sensors Based on Polyethylene Oxide/CuO/Multi Walled Carbon Nanotubes Composite Nanofibers
Source: MDPI journal article supplement (doi:10.3390/ma14041037), 2021-02-22
Supplement: s1 [file s1]

## Article

# Highly Sensitive Humidity Sensors Based on Polyethylene Oxide/CuO/Multi Walled Carbon Nanotubes Composite Nanofibers

Waqas Ahmad<sup>1</sup>, Bushra Jabbar<sup>1</sup>, Imtiaz Ahmad<sup>1</sup>, Badrul Mohamed Jan<sup>2</sup>, Minas M. Stylianakis<sup>3</sup>, George Kenanakis<sup>3</sup> and Rabia Ikram<sup>2,\*</sup>

<sup>1</sup> Institute of Chemical Sciences, University of Peshawar, 25120 Khyber Pukhtunkhwa, Pakistan; waqasahmad@uop.edu.pk (W.A.); bushrajabbar93@gmail.com (B.J.); dr\_imtiaz@uop.edu.pk (I.A.)

<sup>2</sup> Department of Chemical Engineering, University of Malaya, 50603 Kuala Lumpur, Malaysia; badrules@um.edu.my (B.M.J.); raab@um.edu.my (R.I.)

<sup>3</sup> Institute of Electronic Structure and Laser, Foundation for Research and Technology-Hellas, N. Plastira 100, Vasilika Vouton, GR-700 13 Heraklion, Crete, Greece; stylianakis@iesl.forth.gr (M.M.S.); gkenanak@iesl.forth.gr (G.K.)

\* Correspondence: raab@um.edu.my

**Citation:** Ahmad, W.; Jabbar, B.; Ahmad, I.; Janb, B.M.; Stylianakis, M.M.; Kenanakis, G.; Ikram, R. Highly Sensitive Humidity Sensors based on Polyethylene Oxide/CuO/Multi Walled Carbon Nanotubes Composite Nanofibers. *Materials* **2021**, *14*, 1037.

<https://doi.org/10.3390/ma14041037>

Academic Editor: Antonio Di Bartolomeo

Received: 18 January 2021

Accepted: 16 February 2021

Published: 22 February 2021

**Publisher's Note:** MDPI stays neutral with regard to jurisdictional claims in published maps and institutional affiliations.

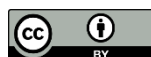

**Copyright:** © 2021 by the authors. Licensee MDPI, Basel, Switzerland. This article is an open access article distributed under the terms and conditions of the Creative Commons Attribution (CC BY) license (<http://creativecommons.org/licenses/by/4.0/>).

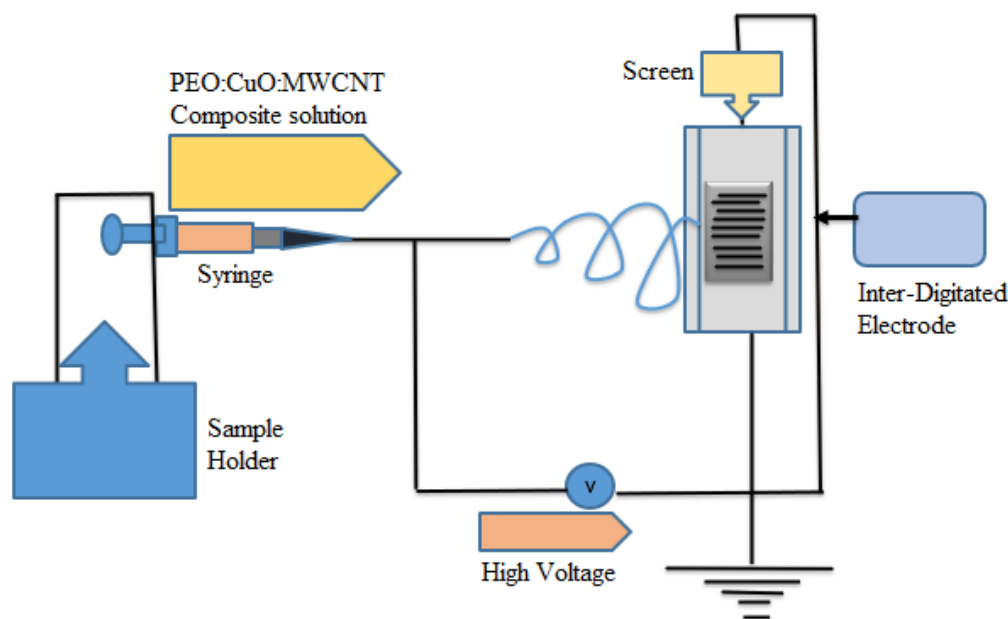

**Figure S1.** The schematic diagram of the Electrospinning process.

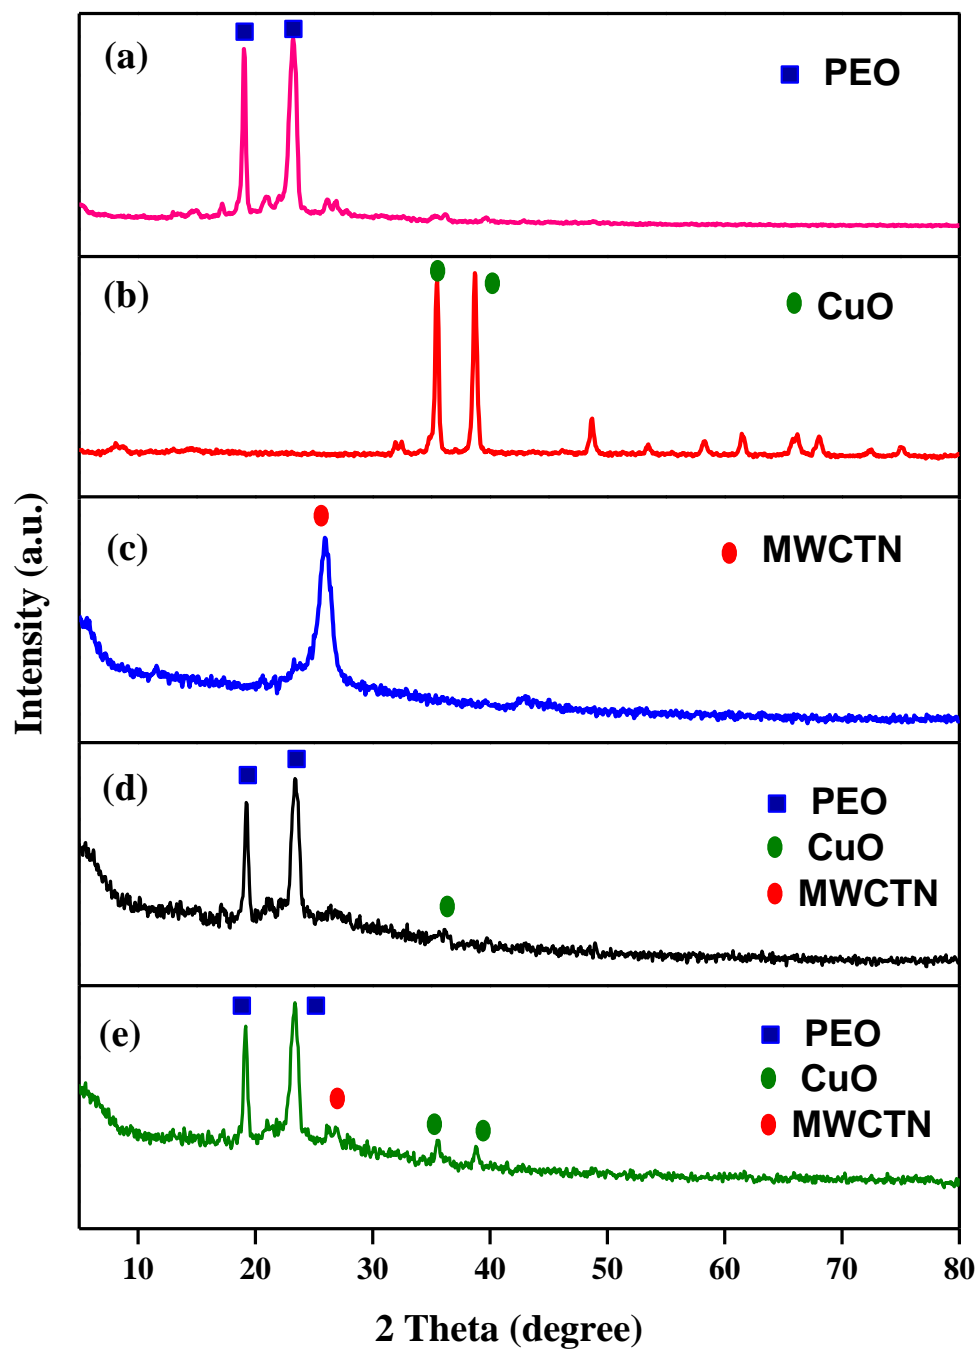

**Figure S2.** The XRD patterns of (a) pure PEO (b) CuO nanoparticles (c) MWCNT (d) PEO-CuO-MWCNT: 1% nanocomposite and (e) PEO-CuO-MWCNT: 3% nanocomposite.

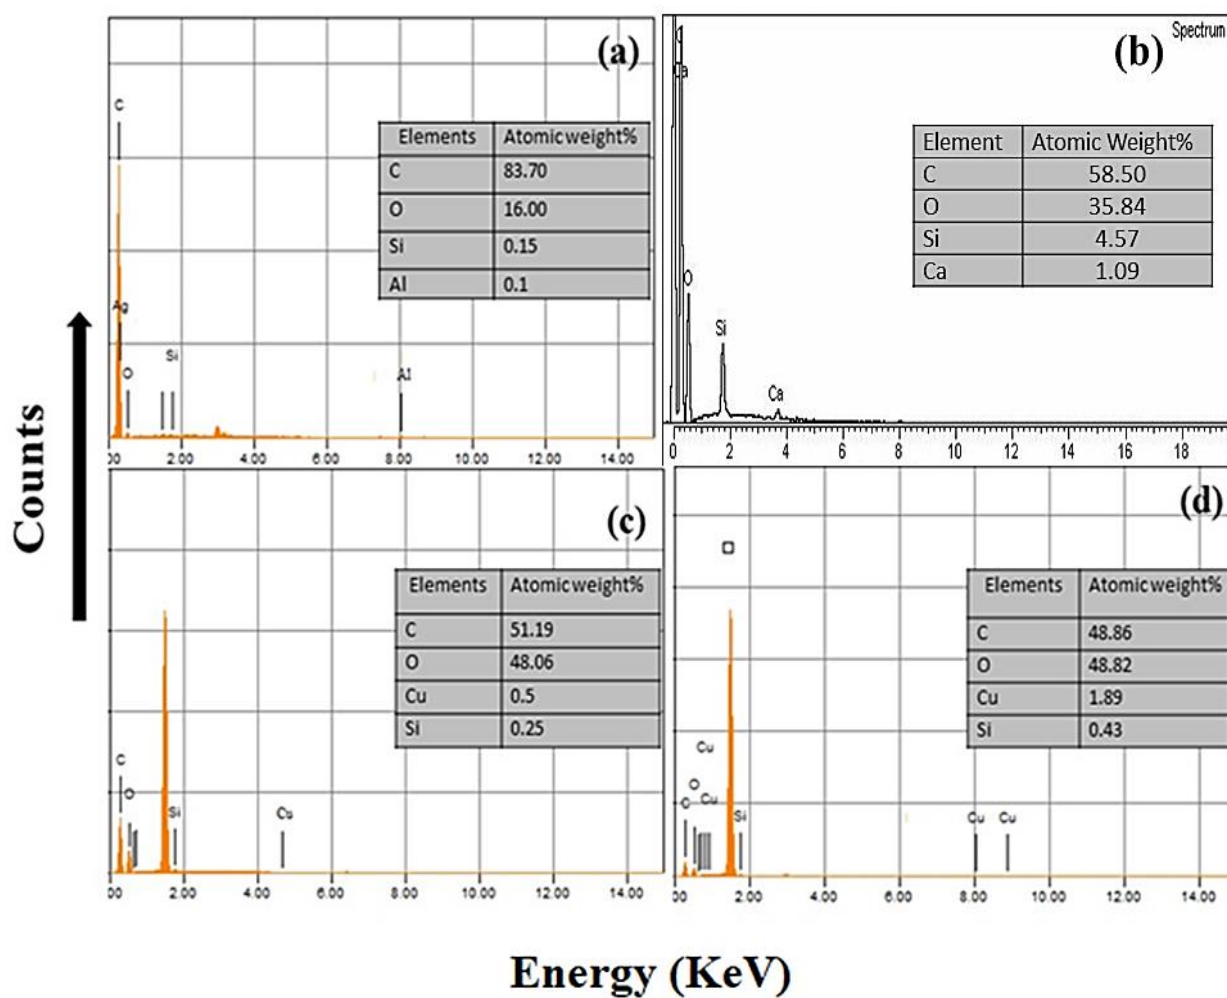

**Figure S3.** EDS elemental profiles of (a) MWCNT (b) pure PEO (c) PEO-MWCNT-CuO: 1% nanofibers, and (d) PEO-MWCNT-CuO: 3% composite nanofibers.
